# Supplementary material for: CO2-blown microcellular non-isocyanate polyurethane (NIPU) foams: from bio- and CO2-sourced monomers to potentially thermal insulating materials
Source: Royal Society of Chemistry journal article supplement (doi:10.1039/c5gc02723c), 2015-12-08
Supplement: c5gc02723c1.pdf [file c5gc02723c1.pdf]

### Supporting Information

#### CO<sub>2</sub>-blown microcellular non-isocyanate polyurethane (NIPU) foams: from bio- and CO<sub>2</sub>-sourced monomers to potentially thermal insulating materials

B. Grignard <sup>a</sup>, J.-M. Thomassin <sup>a</sup>, S. Gennen <sup>a</sup>, L. Poussard <sup>b</sup>, L. Bonnaud <sup>b</sup>, J.-M. Raquez <sup>b</sup>, P. Dubois <sup>b</sup>, M. -P. Tran <sup>c</sup>, C. B. Park <sup>c</sup>, C. Jerome <sup>\*a</sup>, C. Detrembleur <sup>\*a</sup>

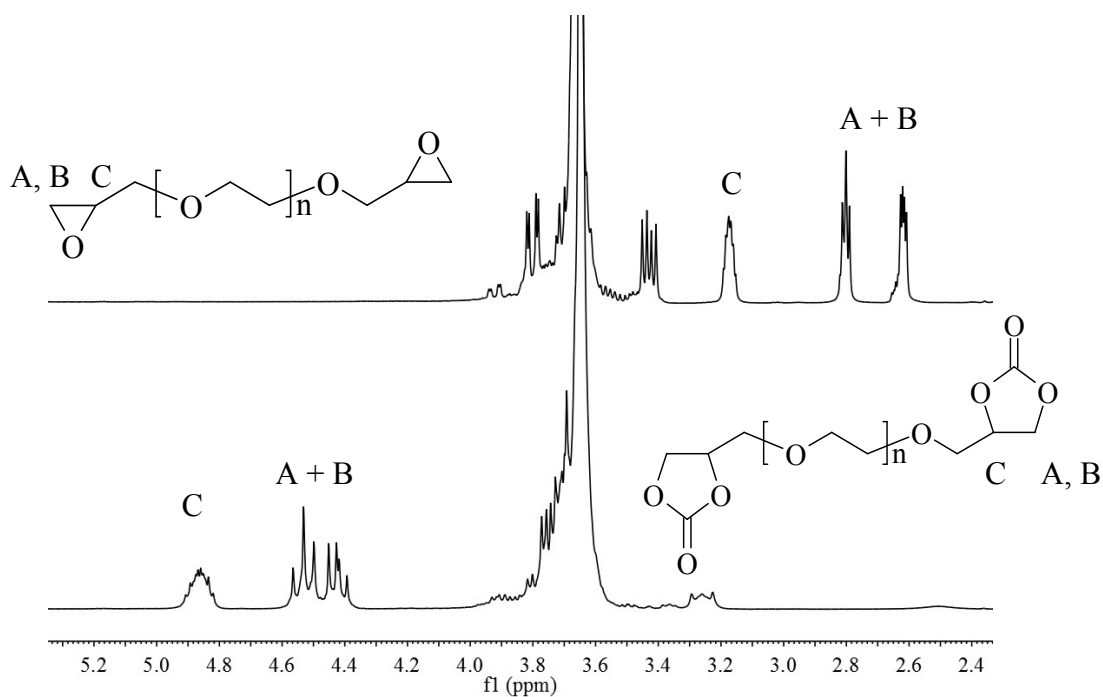

**ESI1** : <sup>1</sup>H NMR characterization of poly(ethylene glycol) bis(cyclocarbonate)

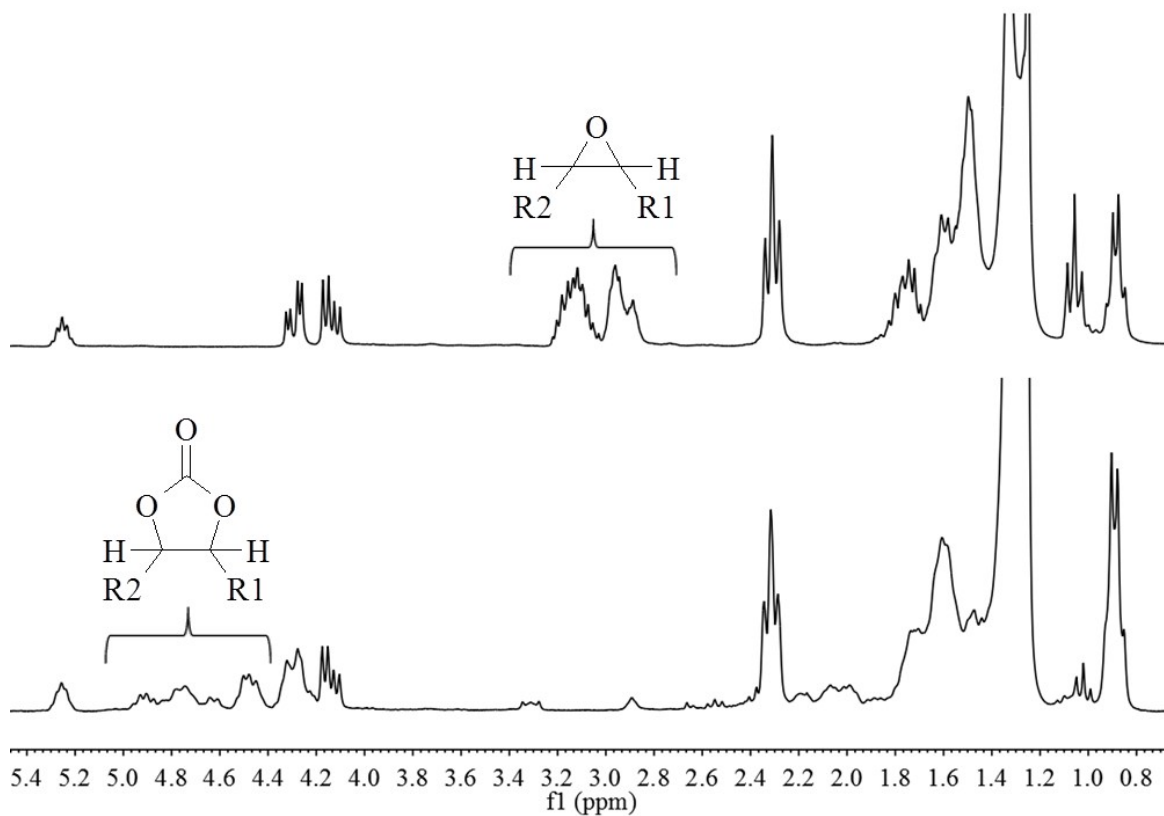

**ES12** :  $^1\text{H}$  NMR characterization of CSBO

**a) Coupling of ethylene carbonate with n-heptyl amine.** 1 g of ethylene carbonate (11.35 mmol) was introduced in a glass tube containing 1.68 mL of n-heptyl amine (11.35 mmol), 1.3-bis-(2-hydroxyhexafluoroisopropyl)benzene (0.142 mL, 5 mol%) and 4mL of dioxane. The reaction mixture was then heated to 60°C and the conversion was determined by online Raman spectroscopy using a red laser ( $\lambda = 785 \text{ nm}$ ) according to a procedure described elsewhere.<sup>1</sup> Spectra were recorded every 3 minutes and conversions were determined (after normalization of the Raman spectra) by comparing the evolution of the intensity of the peak characteristic of ethylene carbonate at  $716 \text{ cm}^{-1}$  with a signal that did not evolve during the reaction ( $\nu = 835 \text{ cm}^{-1}$ ).

**b)**

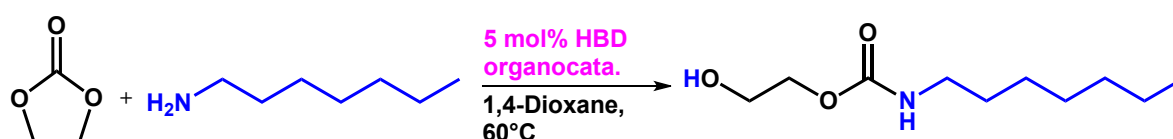

**c)**

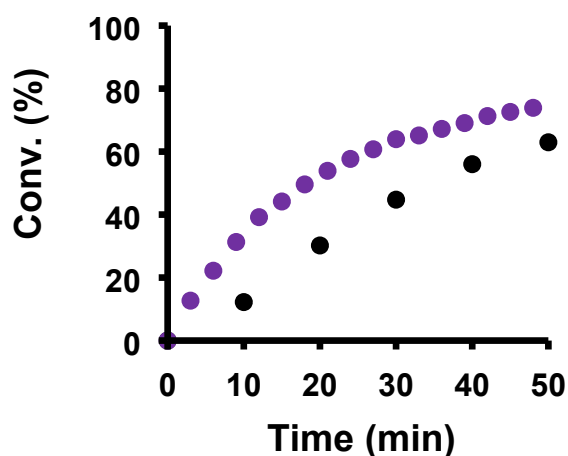

**ESI3:** a) Experimental section for the coupling of ethylene carbonate with n-heptyl amine in the presence of 1,3-bis(hydroxyhexafluoroisopropyl) benzene as catalyst; b) Reaction scheme for this reaction; c) Comparison of the evolution of the conversion with time for this reaction carried out in the presence (purple) or not (black) of 1,3-bis(hydroxyhexafluoroisopropyl) benzene (5 mol% compared to ethylene carbonate). Conditions: Solvent = dioxane, T = 60°C, [EC] = [n-heptylamine] = 1.76 M.

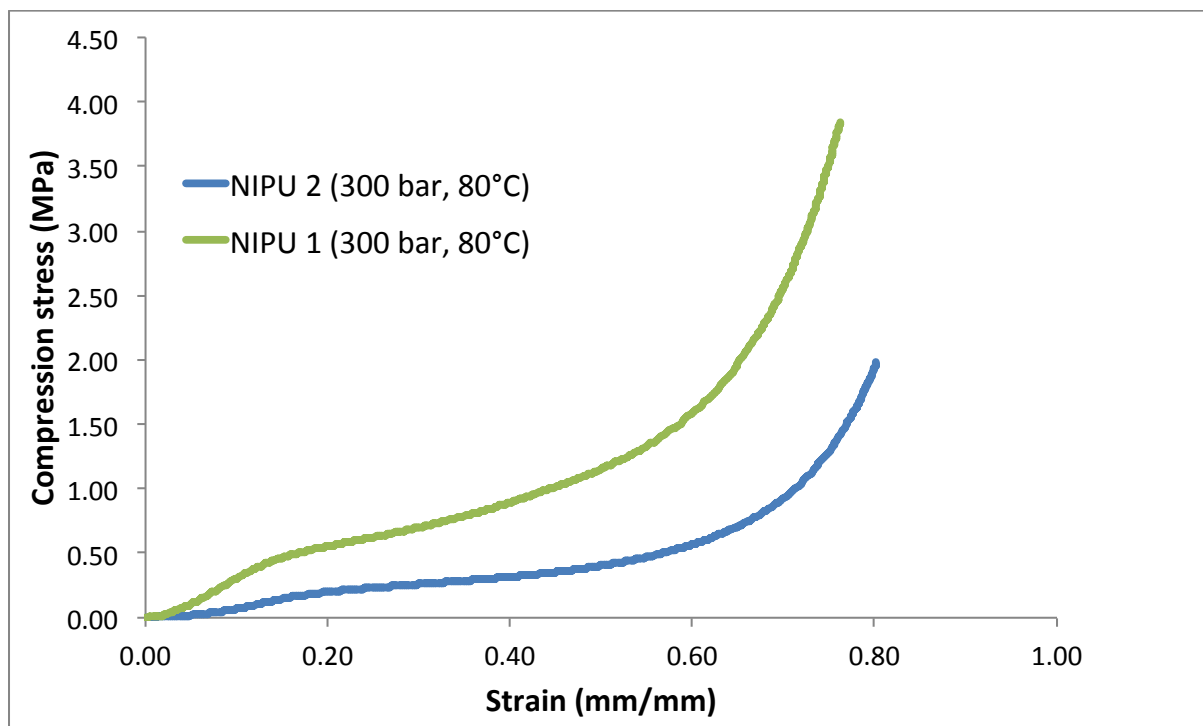

**ESI4:** Compression stress/strain curves for NIPU 1 (sample C, Figure 6) and NIPU 2 (sample G, Figure 6) (2 mm/min.).

**Reference:**

<sup>1</sup> B. Grignard, B. Gilbert, C. Malherbe, C. Jerome, C. Detrembleur, *ChemPhysChem* **2012**, *13*, 2666–2670.
